# Supplementary material for: Peer advocacy and access to healthcare for people who are homeless in London, UK: a mixed method impact, economic and process evaluation protocol
Source: PubMed Central journal article supplement — BMJ Open. 2021 Jun 17;11(6):e050717. doi: 10.1136/bmjopen-2021-050717 (PMC8212404; doi:10.1136/bmjopen-2021-050717), 2021-06-17
Supplement: bmjopen-2021-050717.reviewer_comments.pdf [file bmjopen-2021-050717.reviewer_comments.pdf]

## PEER REVIEW HISTORY

BMJ Open publishes all reviews undertaken for accepted manuscripts. Reviewers are asked to complete a checklist review form (<http://bmjopen.bmj.com/site/about/resources/checklist.pdf>) and are provided with free text boxes to elaborate on their assessment. These free text comments are reproduced below.

## ARTICLE DETAILS

|                            |                                                                                                                                                                                                                                  |
|----------------------------|----------------------------------------------------------------------------------------------------------------------------------------------------------------------------------------------------------------------------------|
| <b>TITLE (PROVISIONAL)</b> | Peer advocacy and access to health care for people who are homeless in London, United Kingdom: A mixed-method impact, economic, and process evaluation protocol                                                                  |
| <b>AUTHORS</b>             | Rathod, Sujit; Guise, Andrew; Annand, PJ; Hosseini, Paniz; Williamson, Elizabeth; Miners, Alec; Bowgett, Kate; Burrows, Martin; Aldridge, Robert; Luchenski, Serena; Menezes, Dee; Story, Alistair; Hayward, Andrew; Platt, Lucy |

This article was not externally reviewed at BMJ Open. Protocols that have been independently assessed prior to submission to BMJ Open are usually fast-tracked to publication on the grounds that further substantial changes will not be possible. This independent assessment will usually be external, independent review for both a substantial grant award from a non-commercial or government funder and ethics approval.
